# Supplementary material
Source: publisher figshare collection journal article supplement (https://diabetesjournals.figshare.com/articles/dataset/_/13042601)
Supplement: Supplementary file 1 [file 1]

**Supplementary Figure 1: Cardiac Atg7 deletion alters gene expression profiles in subcutaneous adipose tissues.** Using quantitative PCR arrays, we compared alterations in 78 genes involved in fatty acid and carbohydrate metabolism in subcutaneous adipose tissue. (A) A heat map was used to show the difference of gene expression in AKO and WT mice; n=4 mice per group. Scale bar shows log2 fold change of AKO group over WT group was displayed with red as increased and blue as decreased. (B) GSEA analysis was used to examine gene pathways altered by Atg7 deletion; PPAR signaling pathway was shown enriched with p-value<0.05. (C) schematic representation of alterations in PPAR signaling by ATG7 deletion.
